# Supplementary material for: Herpesvirus Glycoproteins Undergo Multiple Antigenic Changes before Membrane Fusion
Source: PubMed Central journal article supplement (PMC3253813; doi:10.1371/journal.pone.0030152), 2012-01-09

Figure S1

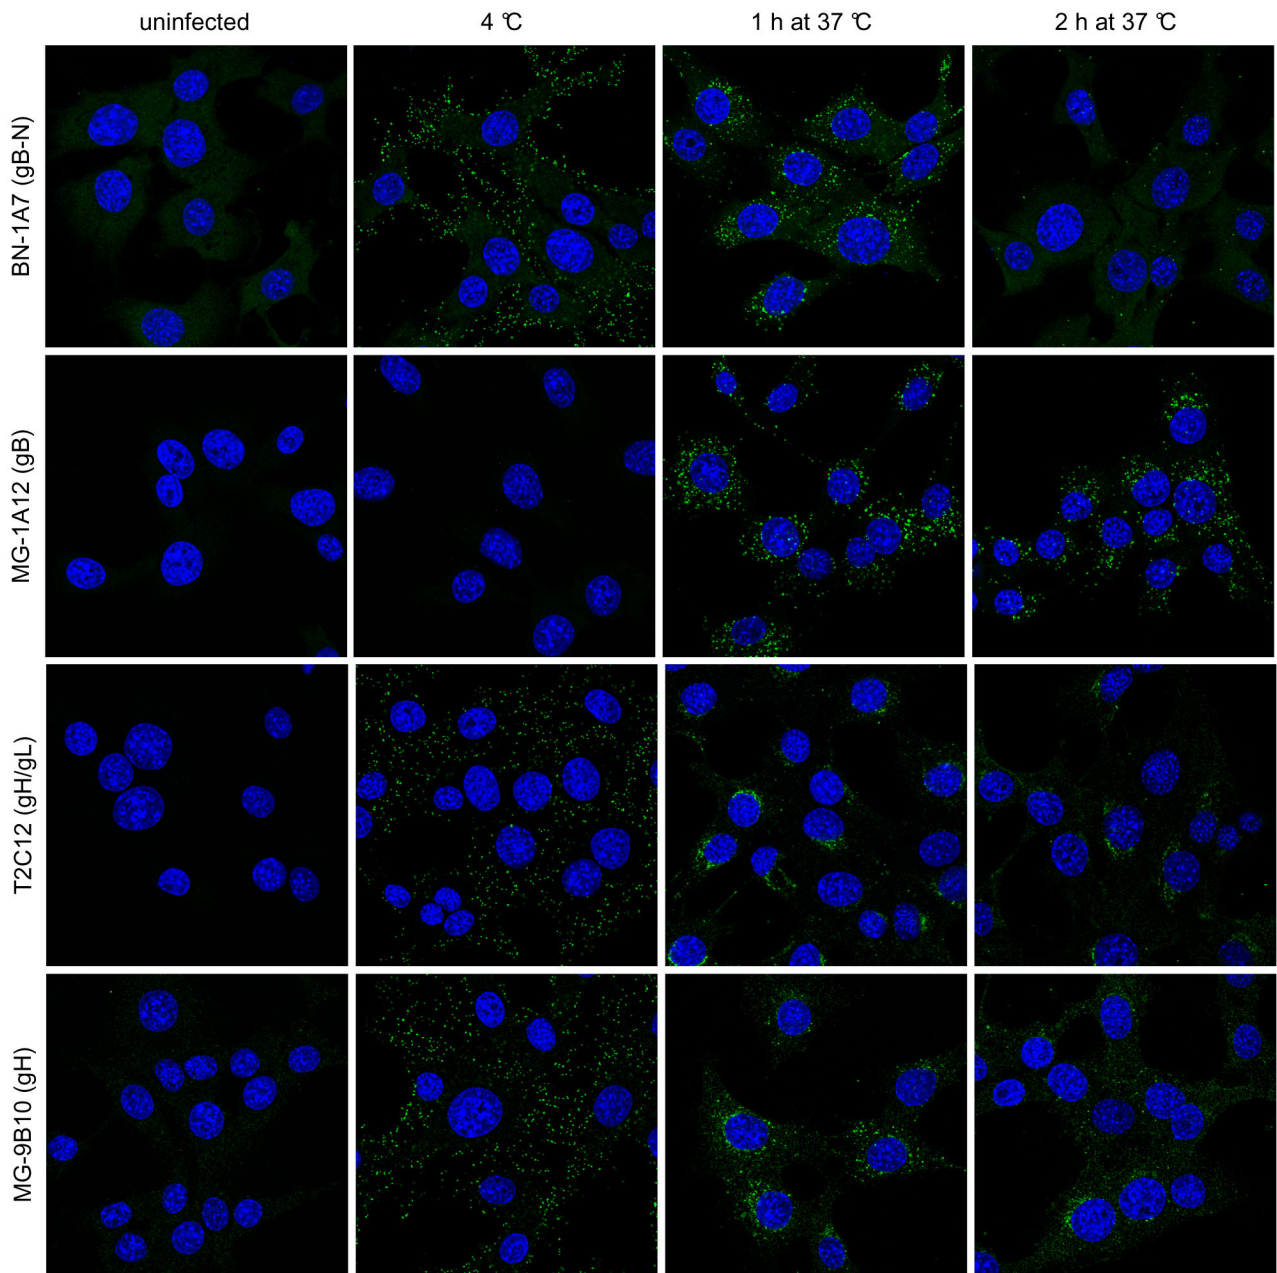

Supplement: pone.0030152.s001.pdf [file pone.0030152.s001.pdf]
